# Supplementary material
Source: Research Square preprint supplement (doi:10.21203/rs.3.rs-9635247/v1)
Supplement: Supplementary file 1 [file 529528589bdfce687305912a.docx]

**Multimedia Appendix 5.** Stepwise regression analysis (Global Quality Score).

| **Model** | **Predictors** | **R²** | **Adjusted**  **R²** | **SE of the estimate** | **F change** | **P value**  **(F change)** | **ANOVA**  **F test (df)** | **ANOVA P value** |
| --- | --- | --- | --- | --- | --- | --- | --- | --- |
| 1 | Constant  + PEMAT-U | 0.312 | 0.31 | 0.814 | 168.954 | <0.001 | 168.954 (1,373) | <0.001 |
| 2 | Constant  + PEMAT-U  + PEMAT-A | 0.323 | 0.319 | 0.808 | 6.25 | 0.013 | 88.791 (2,372) | <0.001 |
| 3 | Constant  + PEMAT-U  + PEMAT-A  + Duration | 0.438 | 0.433 | 0.738 | 75.635 | <0.001 | 96.282 (3,371) | <0.001 |

Abbreviations: PEMAT-U, Patient Education Materials Assessment Tool–Understandability; PEMAT-A, Patient Education Materials Assessment Tool–Actionability.
