# Supplementary material
Source: Research Square preprint supplement (doi:10.21203/rs.3.rs-9635247/v1)
Supplement: Supplementary file 2 [file b93c7179c5845d3ea0af82f6.docx]

**Multimedia Appendix 3.** Characteristics of the videos across sources.

| **Variable** | **CMP (n = 222)** | **OHI (n = 56)** | **SC (n = 76)** | **PC (n = 7)** | **Others (n = 39)** | **Kruskal-Wallis H test (df)** | **Asymptotic significance** |
| --- | --- | --- | --- | --- | --- | --- | --- |
| Duration (s) | 71 (45–155) | 79 (49–156) | 110 (59–290) | 233 (85–258) | 107 (80–190) | 14.351 (4) | 0.006 |
| Likes | 2616 (231–15000) | 412 (54–2574) | 896 (121–9127) | 1634 (152–48514) | 38 (16–1068) | 36.179 (4) | <0.001 |
| Comments | 141 (20–740) | 21 (2–162) | 58 (3–302) | 480 (158–1445) | 7 (1–43) | 38.252 (4) | <0.001 |
| Followers | 127000 (9328–523025) | 10900 (2220–87750) | 79400 (2048–828500) | 323000 (73870–891000) | 1359 (93–7294) | 50.303 (4) | <0.001 |
| GQS | 3 (3–4) | 3 (3–4) | 3 (3–4) | 2 (2–2) | 3 (2–3) | 28.056 (4) | <0.001 |
| mDISCERN | 3 (2–3) | 3 (2–3) | 3 (3–4) | 3 (1–4) | 3 (2–3) | 10.667 (4) | 0.031 |
| PEMAT-U | 72.1 (62.5–77.8) | 75.0 (61.5–83.3) | 69.2 (55.6–76.9) | 69.2 (45.8–72.7) | 58.3 (50.0–66.7) | 27.978 (4) | <0.001 |
| PEMAT-A | 75.0 (33.3–100.0) | 58.3 (0.0–100.0) | 50.0 (0.0–100.0) | 66.7 (12.5–100.0) | 25.0 (0.0–50.0) | 40.568 (4) | <0.001 |

Note: Values are presented as median (IQR) unless otherwise indicated.

Abbreviations: GQS, Global Quality Score; mDISCERN, modified DISCERN; PEMAT-U, Patient Education Materials Assessment Tool–Understandability; PEMAT-A, Patient Education Materials Assessment Tool–Actionability; IQR, Interquartile Range.
