# Supplementary material
Source: Research Square preprint supplement (doi:10.21203/rs.3.rs-9635247/v1)
Supplement: Supplementary file 3 [file b998cd6219fd377813a963b3.docx]

**Multimedia Appendix 4.** Percentage distribution of anesthesia education videos by source and content on different platforms.

| **Variable** | **Bilibili (%)** | **Douyin (%)** | **TikTok (%)** | **YouTube (%)** | **Kruskal-Wallis H test (df)** | **Asymptotic significance** |
| --- | --- | --- | --- | --- | --- | --- |
| **Source** |  |  |  |  |  |  |
| CMP | 32 | 58 | 80 | 52 | 47.295 (3) | <0.001 |
| OHI | 10 | 21 | 5 | 20 | 15.078 (3) | 0.002 |
| SC | 28 | 11 | 10 | 27 | 18.796 (3) | <0.001 |
| PC | 3 | 0 | 3 | 1 | 3.916 (3) | 0.271 |
| Others | 27 | 10 | 2 | 0 | 51.324 (3) | <0.001 |
| **Content** |  |  |  |  |  |  |
| The Anesthesia Profession | 16 | 22 | 6 | 13 | 10.837 (3) | 0.013 |
| Safety, Risks & Myth Busting | 14 | 15 | 9 | 7 | 4.471 (3) | 0.215 |
| Perioperative Process & Patient Experience | 19 | 14 | 9 | 5 | 10.654 (3) | 0.014 |
| Basics & Principles of Anesthesia | 51 | 49 | 76 | 75 | 27.856 (3) | <0.001 |

Abbreviations: CMP, Certified Medical Professionals; OHI, Official Health Institutions; SC, Science Communicators; PC, Patients & Caregivers.
