# Supplementary material
Source: Research Square preprint supplement (doi:10.21203/rs.3.rs-9635247/v1)
Supplement: Supplementary file 4 [file e325a7ca1eec07d983131640.xlsx]

## Sheet: bilibili
Duration (s)	Days since upload (d)	Likes	Comments	Followers	Video source	Video theme	GQS	mDISCERN_1	mDISCERN_2	mDISCERN_3	mDISCERN_4	mDISCERN_5	PEMATU_1	PEMATU_2	PEMATU_3	PEMATU_4	PEMATU_5	PEMATU_6	PEMATU_7	PEMATU_8	PEMATU_9	PEMATU_10	PEMATU_11	PEMATU_12	PEMATU_13	PEMATA_1	PEMATA_2	PEMATA_3	PEMATA_4
268	1204	165000	4652	3498000	3	4	5	1	1	1	1	1	1	1	2	1	1	2	1	2	0	1	1	1	0	2	2	2	2
560	2010	585	35	40000	2	1	4	1	0	1	0	1	1	2	2	1	2	2	1	2	0	1	1	0	0	2	2	2	0
385	1345	38	1	24	5	3	3	1	0	1	0	1	1	1	1	1	1	2	1	2	0	1	1	1	0	1	1	1	2
158	1118	17	0	3033	5	4	2	1	0	0	0	1	1	1	2	1	2	2	1	2	0	0	1	1	0	1	1	2	2
459	899	28	3	1586	5	2	3	1	0	1	0	1	1	1	1	1	2	2	1	2	0	1	1	1	0	1	2	2	2
897	1330	36000	1405	2172000	3	1	3	0	1	1	0	1	2	1	1	1	2	2	2	1	0	1	1	0	0	1	1	2	0
312	1078	424	7	30.3	3	4	3	1	1	1	0	1	1	1	2	1	2	2	2	1	0	1	1	0	0	2	2	2	0
433	1186	16000	2009	1435	3	2	4	1	1	1	0	1	1	1	1	1	2	2	1	2	0	1	1	0	0	2	2	2	0
532	6577	5080	740	347000	1	2	5	1	1	1	0	1	1	1	2	1	1	1	1	1	0	1	1	1	0	1	1	1	2
75	1489	406	56	1134000	3	4	3	0	0	0	0	1	2	1	2	1	2	2	1	2	0	1	1	0	0	2	2	2	0
354	179	15000	789	347000	1	2	5	1	1	1	0	1	1	1	2	1	1	1	1	1	0	1	1	1	0	1	1	2	2
713	756	847	84	326000	3	4	3	0	1	1	0	1	2	1	1	1	2	2	2	2	0	1	1	1	0	2	2	2	2
227	566	4394	1529	285000	3	2	3	1	0	1	0	1	1	1	1	1	2	2	2	2	0	1	1	0	0	1	2	1	0
763	399	40	0	23	3	4	4	1	0	1	0	1	1	1	1	1	1	1	1	2	0	1	1	2	0	2	2	2	0
1182	1465	107	1	57000	3	4	3	1	0	1	0	1	1	1	2	1	2	2	2	2	0	2	1	1	0	1	2	2	2
961	233	62000	4249	908000	3	2	4	1	1	1	1	1	1	1	2	1	1	1	1	1	0	1	1	1	0	1	2	2	2
1029	16	637	412	1263	5	4	3	1	0	0	0	1	1	1	1	1	2	2	2	1	0	2	1	1	0	1	1	2	2
248	1261	9	2	125	1	2	4	1	0	1	0	1	1	1	2	1	1	1	1	1	0	1	1	1	0	2	2	2	2
144	1332	51	6	84000	2	4	3	1	0	1	0	0	1	1	2	1	2	2	2	2	0	1	1	1	0	2	2	2	2
501	1600	124000	7211	347000	1	3	5	1	1	1	1	1	1	1	1	1	1	1	1	2	0	1	1	1		1	2	2	2
272	1277	8	0	125	1	4	4	1	0	1	0	1	1	1	2	1	1	1	1	1	0	1	1	1	0	2	2	2	2
289	95	300	18	20000	3	4	3	1	1	1	0	0	1	1	2	1	2	2	2	1	0	1	1	1	0	2	2	2	2
107	3	142	47	82000	5	3	2	1	0	1	0	0	1	1	2	2	2	2	1	2	0	1	1	2	0	2	2	2	2
90	1322	78	15	20	5	4	2	1		1	0	0	1	1	2	1	2	2	1	2	0	1	1	1	0	2	2	2	2
271	648	9	1	133	1	4	4	1	0	1	0	1	1	1	2	1	1	1	1	2	0	1	1	0	0	1	1	2	0
429	713	49	6	2799	5	4	3	1	0	1	0	1	1	1	2	1	2	2	1	2	0	1	1	1	0	1	1	1	2
121	3121	40	10	1352	5	1	1	0	0	1	0	0	2	1	2	1	2	2	2	2	0	1	1	2	0	2	2	2	0
154	968	524	27	14000	2	4	3	1	0	1	0	0	1	1	2	1	2	2	1	2	0	1	1	1	0	1	1	1	2
280	1262	39	0	39000	3	4	4	1	0	1	0	1	1	1	2	1	1	1	1	2	0	1	1	1	0	2	2	2	2
55	1252	145	28	97	2	4	2	1	0	1	0	0	1	1	2	1	0	0	1	0	0	1	1	1	0	2	2	2	2
113	1974	26	6	55	3	2	3	1	0	1	0	1	1	1	2	1	1	1	1		0	1	1	0	0	2	2	2	0
429	1166	32	3	10000	3	2	5	1	1	1	0	1	1	1	1	1	1	1	1	2	0	1	1	1	0	1	1	1	1
95	522	3850	273	347000	1	2	4	1	0	1	0	1	1	1	2	1	2	2	1	1	0	1	1	0	0	1	1	2	0
114	366	2	0	15	5	3	1	1	0	1	0	1	1	1	2	1	2	2	1	2	0	2	1	0	0	1	1	2	0
113	35	2583	115	44000	5	3	3	1	0	1	0	0	1	1	2	1	2	2	1	2	0	1	1	1	0	2	2	2	2
232	304	8922	1029	236000	1	1	5	1	1	1	0	1	1	1	2	1	2	2	1	1	0	1	1	1	0	1	1	2	2
124	574	104	6	5322	1	4	3	1	0	1	0	0	1	2	2	2	2	2	1	2	0	0	0	1	0	2	2	2	2
133	1116	1550	239	488000	1	4	4	1	0	1	0	1	1	1	2	1	2	2	1	2	0	1	1	1	0	1	1	1	1
186	702	168	15	28000	1	4	3	1	0	1	0	1	1	1	2	1	2	2	1	1	0	1	1	0	0	1	1	1	0
442	1618	17000	938	347000	1	4	4	1	1	1	1	1	1	1	2	1	1	1	1	2	0	1	1	1	0	2	2	2	2
99	776	35000	2381	347000	1	4	3	1	0	1	0	1	1	1	2	1	2	2	1	2	0	1	1	0	0	2	2	2	0
60	1031	6	0	406	5	4	2	1	0	1	0	1	1	1	2	1	2	2	1	1	0	1	1	1	0	2	2	2	2
301	15	16	1	2914	1	3	2	1	0	1	0	0	1	1	2	1	2	2	1	2	0	1	2	1	0	1	1	1	2
127	140	152	8	309	4	3	1	0	0	1	0	0	2	1	2	1	2	2	2	2	0	1	1	0	0	2	2	2	0
217	936	17000	817	884000	2	1	4	1	0	1	0	1	1	1	2	1	1	1	1	2	0	1	1	0	0	2	2	2	0
175	834	149000	5007	148000	3	4	5	1	1	1	0	1	1	1	1	1	2	2	1	2	0	1	1	1	0	2	2	2	2
177	258	190	23	7951	5	4	3	1	0	1	0	0	1	1	2	1	2	2	1	2	0	1	1	1	0	1	1	1	2
600	1780	518	164	406	3	3	4	1	0	1	0	1	1	1	1	1	2	2	1	2	0	1	1	1	0	1	2	2	2
258	597	341	73	37000	1	4	3	1	0	1	0	1	1	1	2	1	2	2	1	2	0	0	1	1	0	1	1	1	2
587	1452	16000	1322	347000	1	3	4	1	1	1	0	1	1	1	1	1	1	1	1	2	0	1	1	1	0	2	2	2	2
44	1401	38000	379	189000	3	4	2	0	0	1	0	0	2	1	2	1	0	0	1	0	0	1	1	1	0	1	2	2	2
274	1710	55	26	2258	2	2	4	1	0	1	0	1	1	1	1	1	1	1	1	2	0	1	1	1	0	1	1	2	2
146	214	1042	14	41000	5	3	3	0	0	1	0	0	1	1	2	1	2	2	2	2	0	1	1	1	0	2	2	2	2
102	1319	14	1	1678	5	1	2	1	0	1	0	0	1	1	2	1	2	2	2	2	0	1	1	1	0	2	2	2	2
31	500	5	0	287	1	4	3	1	0	1	0	1	1	1	2	1	0	0	1	0	0	1	1	1	0	1	1	1	2
141	670	3005	324	976	5	1	3	1	1	1	0	0	1	1	2	1	2	2	1	2	0	1	1	1	0	1	2	2	2
702	1955	441	85	759	3	4	3	1	1	1	0	1	1	1	2	1	2	2	1	2	0	0	1	1	0	1	1	2	2
534	445	30	1	2574	2	3	4	1	0	1	0	1	1	1	1	1	1	2	1	2	0	1	1	1	0	1	1	1	1
287	1328	24	2	20	5	4	3	1	0	1	0	1	1	1	2	1	1	1	1	2	0	1	1	1	0	1	2	2	1
210	90	1242	62	22000	5	3	2	0	0	1	0	0	2	1	2	1	2	2	2	2	0	1	1	1	0	2	2	2	2
955	325	8823	467	105000	3	4	3	1	2	1	0	1	1	1	2	1	2	2	2	2	0	1	1	0	0	1	2	2	0
427	473	642	210	45000	3	1	3	1	0	1	0	1	1	1	2	1	2	2	1	1	0	1	1	2	0	1	1	2	2
63	616	4260	171	347000	1	4	3	0	1	1	0	0	2	1	2	1	2	2	2	2	0	1	1	1	0	2	2	2	2
93	472	716	55	830000	2	2	4	1	1	1	0	1	1	1	1	1	2	2	1	1	0	1	1	1	0	1	1	1	1
336	687	31	1	121	5	1	1	0	1	1	0	0	2	1	2	1	2	2	2	2	0	1	1	1	2	2	2	2	2
62	456	38	14	6636	5	4	2	1	0	1	0	0	1	2	2	0	2	2	1	2	0	0	2	1	0	1	2	1	2
118	1227	182	10	330	1	4	3	1	1	1	0	1	1	1	2	1	2	2	1	2	0	1	1	0	0	1	1	2	0
226	1370	776	166	4369	3	3	4	1	0	1	0	1	1	1	2	1	1	2	1	2	0	1	1	1	0	1	1	1	1
64	22	12	2	1359	5	4	2	1	0	1	0	1	1	1	2	1	2	2	2	2	0	1	1	0	0	2	2	2	0
102	47	3469	766	1429	5	4	2	1	0	1	0	1	1	1	2	1	2	2	2	2	0	1	1	1	0	1	2	2	2
354	1324	60	4	3390	1	4	4	1	1	1	0	1	1	1	2	1	2	2	1	1	0	1	1	1	0	1	1	2	2
164	618	491	180	119	3	1	2	0	0	1	0	0	2	2	2	0	2	2	1	1	0	0	2	1	2	2	2	2	2
249	800	93000	1654	732000	4	4	2	0	0	1	0	0	2	1	2	1	2	2	2	2	0	1	1	1	0	1	2	2	2
280	1779	36	12	69	3	1	3	1	1	1	0	1	1	1	1	1	1	2	1	2	0	1	1	0	0	1	2	2	1
168	706	3	0	8	5	1	3	1	0	1	0	1	1	1	2	1	1	1	1	1	0	1	1	1	0	1	2	1	2
80	1319	4	1	3	5	4	2	1	0	1	0	0	1	1	1	1	2	2	1	2	0	0	1	1	0	2	2	2	2
243	1262	55	1	125	1	4	3	1	0	1	0	0	1	1	1	1	2	1	1	2	0	1	1	1	0	1	2	2	2
62	121	138	2	11000	3	4	2	1	0	1	0	0	1	1	2	1	2	2	2	2	0	1	1	1	0	2	2	2	2
49	390	8	0	311	2	3	3	1	0	1	0	1	1	1	2	1	0	0	1	0	0	1	1	1	0	2	2	2	2
41	1164	63000	1136	1890	1	4	3	1	0	1	0	0	1	1	2	1	0	0	2	0	0	1	1	1	0	1	2	2	2
183	1025	9	0	12	5	2	3	1	1	1	0	1	1	1	2	1	2	2	1	2	0	1	1	1	0	1	2	2	2
74	102	74000	1149	273000	3	3	2	1		1	0	1	1	1	0	1	2	2	2	2	0	1	1	1	0	1	2	2	2
85	182	1	0	172	1	1	3	1	0	1	0	0	1	1	2	1	2	2	2	2	0	1	1	0	0	1	2	2	0
493	25	52	12	9912	1	4	4	1	0	1	0	0	1	1	2	1	2	2	1	2	0	1	1	1	0	1	1	1	1
68	12	5	0	2507	1	3	3	1	0	1	0	0	1	2	2	0	2	2	1	2	0	0	2	1	0	1	1		1
37	211	385	16	465	2	4	3	1	0	1	0	0	1	1	2	1	0	0	1	0	0	1	1	1	0	1	1	1	1
82	146	20	4	4745	1	4	3	1	0	1	0	1	1	1	2	1	2	2	1	2	0	1	1	1	0	1	1	1	1
177	41	236	65	3617	3	1	4	1	1	1	0	0	1	1	2	1	1	1	1	2	0	1	1	1	0	1	1	2	2
122	1625	7940	652	1525000	1	4	3	1	0	1	0	1	1	1	2	1	2	2	1	1	0	1	1	0	0	1	1	1	0
79	667	12	1	627	3	4	2	1	0	1	0	1	1	1	2	1	2	2	1	2	0	0	1	1	0	2	2	2	2
144	903	1242	618	32000	1	4	4	1	0	1	0	1	1	1	2	1	1	1	1	2	0	1	1	1	0	1	1	2	2
28	653	4	0	232	5	4	2	0	0	1	0	1	2	1	2	1	0	0	2	0	0	1	1	1	0	1	2	2	2
545	229	760	125	19000	1	3	5	1	1	1	1	1	1	1	2	1	2	2	1	2	0	1	1	0	0	1	1	1	0
233	1205	4029	307	323000	4	3	2	0	0	1	1	1	2	1	2	1	2	2	1	2	0	1	1	1	0	2	2	2	2
45	102	41	10	19000	5	3	1	0	0	1	0	0	2	1	2	1	0	0	2	0	0	1	1	1	0	2	2	2	2
262	431	60	18	8229	1	4	3	1	0	1	0	1	1	1	1	1	2	2	1	1	0	1	1	0	0	1	1	2	0
736	1551	1726	255	902	3	1	5	1	1	1	0	1	1	1	1	1	1	1	1	2	0	1	1	0	0	1	2	2	0
84	1336	7	0	504	5	2	3	1	0	1	0	1	1	1	2	1	2	2	1	2	0	1	1	1	0	1	1	1	2
127	1436	182	47	12000	1	4	4	1	0	1	0	1	1	1	2	1	2	2	1	2	0	1	1	0	0	1	1	2	0
77	103	98	17	126000	1	1	5	1	1	1		1	1	1	2	1	2	2	1	1	0	1	1	0	0	1	2	2	0

## Sheet: douyin
Duration (s)	Days since upload (d)	Likes	Comments	Followers	Video source	Video theme	GQS	mDISCERN_1	mDISCERN_2	mDISCERN_3	mDISCERN_4	mDISCERN_5	PEMATU_1	PEMATU_2	PEMATU_3	PEMATU_4	PEMATU_5	PEMATU_6	PEMATU_7	PEMATU_8	PEMATU_9	PEMATU_10	PEMATU_11	PEMATU_12	PEMATU_13	PEMATA_1	PEMATA_2	PEMATA_3	PEMATA_4
286	62	57000	3015	179000	1	2	5	1	0	1	0	1	1	1	1	1	1	1	1	2	0	1	1	1	1	1	1	1	1
92	203	56000	2339	77000	5	1	2	1	0	1	0	1	1	1	2	1	0	0	2	2	0	1	1	1	0	2	2	2	2
307	71	1050	260	5883	1	1	4	1	1	1	1	1	1	1	2	1	2	2	1	2	0	1	1	1	0	1	1	2	2
123	73	989	78	267000	1	4	3	1	0	1	0	1	1	1	2	1	2	1	1	2	0	1	1	0	0	2	1	2	0
225	133	147000	3850	31357000	1	1	4	1	1	1	0	1	1	1	2	1	1	1	1	2	0	1	1	0	0	1	1	1	0
94	100	9642	822	8785	1	1	3	1	1	1	0	0	1	1	2	1	1	2	1	2	0	1	1	0	0	1	1	1	0
48	376	36000	29000	118000	1	3	3	1	0	1	0	1	1	1	2	1	0	0	1	0	0	1	1	0	0	2	2	2	0
61	57	15000	10000	95000	1	4	4	1	0	1	0	1	1	1	2	1	1	2	1	2	0	1	1	0	0	1	1	1	0
161	67	2760	395	28000	1	4	4	1	0	1	0	1	1	1	2	1	1	2	1	1	0	1	1	0	0	1	1	1	0
136	321	946	159	20000	1	4	5	1	0	1	0	1	1	1	2	1	1	1	1	1	0	1	1	0	0	1	1	1	2
15	19	3686	1590	9177	1	3	2	1	0	1	0	0	1	2	2	0	0	0	2	0	0	0	2	0	0	2	2	2	0
104	1005	7178	1290	14000	1	2	4	1	1	1	0	1	1	1	2	1	1	2	1	1	0	1	1	0	0	1	2	2	0
45	1687	10000	1390	271000	2	3	3	1	0	1	0	0	1	1	2	1	0	0	1	0	0	1	2	0	0	2	2	2	0
69	14	2163	422	5898	1	3	3	1	0	1	0	0	1	1	1	1	1	2	1	2	0	1	1	0	0	2	2	2	0
53	79	1789	759	6283	1	4	3	1	0	1	0	0	1	1	2	1	0	0	1	0	0	1	1	1	0	2	2	2	2
204	23	1977	35	69000	1	4	5	1	1	1	0	1	1	1	2	1	1	1	1	2	0	1	1	1	0	1	1	1	2
40	2260	50000	5697	7268	2	2	3	1	1	0	0	0	1	1	2	1	0	0	1	0	0	1	1	0	0	2	2	2	0
36	498	440	177	15000	2	4	3	1	0	1	0	1	1	1	2	1	0	0	1	0	0	1	1	0	0	2	2	2	0
56	56	17000	2596	1248	5	4	2	1	0	1	0	0	1	1	2	1	0	0	2	0	0	1	1	0	0	2	2	2	0
82	814	11000	581	3109000	3	4	4	1	0	1	0	1	1	1	1	1	1	2	1	2	0	1	1	1	0	2	2	2	2
52	1293	216	24	35000	1	2	4	1	0	1	0	0	1	1	2	1	0	0	1	0	0	1	1	0	0	1	2	2	0
55	328	2560	695	6434	2	4	3	1	0	1	0	1	1	1	1	1	0	0	1	0	0	1	1	1	0	2	2	2	2
68	729	4061	2094	51000	1	4	2	1	0	1	0	0	1	1	2	1	2	2	1	2	0	1	1	1	0	2	2	2	2
58	407	2543	522	128000	1	2	4	1	1	1	0	1	1	1	2	1	0	0	1	0	0	1	1	1	0	1	1	2	0
99	107	6283	505	72000	1	2	3	1	0	1	0	0	1	2	2	1	2	2	1	2	0	1	2	0	0	1	1	1	0
123	58	30000	9123	29000	1	2	4	1	0	1	0	0	1	1	2	1	1	2	1	1	0	1	1	0	0	1	2	2	0
196	609	35	2	65	5	4	4	1	1	1	0	1	1	1	2	1	1	2	1	2	0	1	1	1	0	2	2	2	2
103	451	638	99	25000	1	4	3	1	0	1	0	1	1	1	2	1	2	2	1	2	0	1	1	0	0	2	2	2	0
271	3	2620	44	143002	1	1	5	1	1	1	0	1	1	1	2	1	1	1	1	1	0	1	1	1	0	1	2	2	2
137	61	77000	34000	524000	1	3	3	1	0	1	0	1	1	1	2	1	1	2	1	2	0	1	1	0	0	2	2	2	0
102	19	3326	191	68000	5	1	3	1	0	1	0	1	1	1	2	1	2	2	1	2	0	1	1	0	0	2	2	2	0
105	611	2615	157	7683	2	4	4	1	0	1	0	0	1	1	1	1	1	2	1	2	0	1	1	0	0	1	1	2	0
39	316	2582	64	737000	3	3	2	1	0	1	0	0	1	1	2	1	0	0	1	0	0	1	1	1	0	1	2	2	2
58	772	3008	3697	15000	1	3	3	1	0	1	0	0	1	1	2	1	0	0	1	0	0	1	1	0	0	1	2	2	0
71	88	237	60	6285	1	4	4	1	0	1	0	0	1	1	2	1	1	2	1	1	0	1	1	1	0	2	2	2	2
57	291	460	20	497000	1	4	4	1	0	1	0	0	1	1	2	1	0	0	1	0	0	1	1	1	0	2	2	2	2
91	209	1049	83	276000	1	4	4	1	0	1	0	1	1	1	2	1	1	2	1	2	0	1	1	0	0	1	1	2	0
93	1969	5234	1397	853000	1	2	4	1	1	1	0	1	1	1	2	1	1	2	1	1	0	1	1	1	0	1	2	2	2
67	127	86	7	2252	3	4	2	0	0	1	0	0	2	1	2	1	2	2	1	1	0	1	1	1	0	2	2	2	2
59	129	80	4	4124	3	4	4	1	0	1	0	0	1	1	1	1	0	0	1	0	0	1	1	1	0	2	2	2	2
29	1346	4557	669	223000	1	4	3	1	0	1	0	1	1	1	2	1	0	0	1	0	0	1	1	1	0	2	2	2	2
82	7	19	0	294	3	4	3	1	0	1	0	1	1	1	1	1	2	2	1	2	0	1	1	0	0	1	2	2	0
59	577	7140	1095	101000	2	2	4	1	0	1	0	1	1	1	1	1	0	0	1	0	0	1	1	1	0	1	2	2	2
63	219	7	0	612	1	4	4	1	0	1	0	1	1	1	2	1	1	2	1	2	0	1	1	1	0	1	2	1	2
71	1197	349	36	1416	1	2	3	1	0	1	0	1	1	1	2	1	2	2	1	1	0	1	1	0	0	2	2	2	0
46	303	1021	526	95000	1	1	3	1	0	1	0	0	1	1	2	1	0	0	1	0	0	1	1	1	0	2	2	2	2
41	1194	11000	2460	16336000	2	4	4	1	0	1	0	1	1	1	1	1	0	0	1	0	0	1	1	1	0	2	2	2	2
52	14	1186	295	3018	1	4	2	1	0	1	0	1	1	1	2	1	0	0	1	0	0	1	1	1	0	2	2	2	2
23	757	167	20	22000	1	4	3	1	0	1	0	0	1	1	2	1	0	0	1	0	0	1	1	1	0	2	2	2	2
113	990	229	8	2139	1	4	4	1	0	1	0	1	1	1	1	1	1	2	1	2	0	1	1	1	0	1	2	2	2
59	577	7139	1095	101000	2	2	3	1	0	1	0	1	1	1	2	1	0	0	1	0	0	1	1	0	0	2	2	2	0
106	124	949	281	95000	1	4	4	1	0	1	0	1	1	1	2	1	1	1	1	1	0	1	1	1	0	1	2	2	2
133	171	766	322	3843	1	4	4	1	0	1	0	1	1	1	1	1	2	2	1	1	0	1	1	1	0	1	1	1	2
97	138	52	10	1390	1	4	4	1	0	1	0	1	1	1	1	1	2	2	1	1	0	1	1	1	0	1	1	1	2
35	166	558000	227000	53000	2	4	2	1	0	1	0	0	1	2	2	2	0	0	1	0	0	0	0	0	0	2	2	2	0
97	137	238	24	20000	1	4	4	1	0	1	0	1	1	1	1	1	2	2	1	2	0	1	1	1	0	2	2	2	2
21	17	1545	141	288000	1	4	3	1	0	1	0	1	1	2	2	1	0	0	1	0	0	1	0	1	0	1	2	2	2
45	37	80	15	1592	1	2	3	1	0	1	0	1	1	1	2	1	0	0	1	0	0	1	1	1	0	1	2	2	2
29	490	772	57	199002	1	4	2	1	0	1	0	0	1	1	1	1	0	0	1	0	0	1	1	0	0	2	2	2	0
64	383	585	73	165000	1	4	3	1	0	1	1	1	1	1	2	1	2	2	1	2	0	1	1	1	0	1	2	2	1
155	1030	891	90	2373	1	3	3	1	0	1	0	1	1	1	2	1	2	2	1	2	0	0	1	1	0	1	2	2	2
40	48	35	1	10000	2	4	3	1	0	1	0	1	1	1	2	1	0	0	1	0	0	1	1	1	0	1	1	2	2
176	74	5556	248	69000	1	4	5	1	1	1	0	1	1	1	2	1	1	1	1	1	0	1	1	1	0	1	1	1	1
70	540	95	7	20000	1	3	3	1	0	1	0	1	1	1	2	1	2	2	1	1	0	1	1	1	0	1	1	1	1
157	42	15000	1258	360000	3	2	4	1	0	1	0	1	1	1	2	1	1	1	1	2	0	1	1	1	0	1	2	2	2
87	36	751	91	2552000	3	1	2	1	0	1	0	0	1	1	2	1	2	2	1	2	0	1	1	1	0	2	2	2	2
83	29	33000	1422	150000	3	1	3	1	1	1	0	1	1	1	2	1	2	2	1	2	0	1	1	1	0	2	2	2	2
239	72	19000	2314	96000	1	3	5	1	0	1	0	1	1	1	1	1	1	1	1	2	0	1	1	1	0	1	2	2	2
62	385	1407	39	59000	2	4	3	1	0	1	0	1	1	1	2	1	2	2	1	2	0	1	1	1	0	2	2	2	2
155	532	3128	2334	8407	1	4	4	1	1	1	0	1	1	1	2	1	2	2	1	1	0	1	1	0	0	1	1	1	0
153	67	111	11	21000	3	1	4	1	0	1	0	1	1	1	2	1	1	1	1	1	0	1	1	0	0	1	1	1	0
40	1842	2453	284	223000	1	1	2	1	0	0	0	0	1	1	2	1	0	0	1	0	0	1	1	0	0	2	2	2	0
73	712	77	5	408	1	4	2	1	0	1	0	0	1	1	2	1	1	2	1	2	0	1	1	1	0	2	2	2	2
64	25	306	145	27000	2	4	3	1	0	1	0	1	1	1	2	1	2	2	1	2	0	1	1	1	0	2	2	2	2
50	37	18	1	3608	5	1	3	1	0	1	0	1	1	1	2	1	0	0	1	0	0	1	1	0	0	1	2	2	0
116	30	103	6	31000	1	2	3	1	0	1	0		1	1	2	1	1	1	1	1	0	1	1	1	0	11	2	2	2
105	151	78	6	3394	1	1	3	1	0	1	0	1	1	1	2	1	2	2	1	2	0	1	1	0	0	2	2	2	0
49	206	5152	215	96000	1	1	4	1	0	1	0	0	1	1	2	1	0	0	1	0	0	1	1	1	0	2	2	2	0
66	1133	1021	53	10000	2	1	3	1	0	1	0	1	1	1	2	1	1	2	1	1	0	1	1	1	0	2	2	2	2
61	814	213	29	10000	2	1	3	1	0	1	0	1	1	1	2	1	2	2	1	1	0	1	1	1	0	2	2	2	2
56	88	102	25	3843	1	3	4	1	0	1	0	0	1	1	2	1	0	0	1	0	0	1	1	0	0	1	1	1	0
32	32	208	111	24000	3	4	1	1	0	1	0	0	1	1	2	1	0	0	1	0	0	1	1	0	0	1	2	2	0
39	227	603	190	96000	1	4	2	1	0	1	0	0	1	1	2	1	0	0	1	0	0	1	1	1	0	2	2	2	0
116	391	12	1	30000	2	1	3	1	0	1	0	1	1	1	2	1	2	2	1	2	0	1	1	0	0	2	2	2	0
88	434	28	8	333	5	3	3	1	0	1	0	0	1	1	2	1	2	2	1	2	0	1	1	1	0	2	2	2	2
43	1502	1511	134	99000	2	4	2	1	0	1	0	0	1	1	2	2	0	0	1	0	0	1	1	1	0	2	2	2	2
131	224	31	1	628	2	1	2	1	0	1	0	0	1	1	2	1	2	2	1	1	0	1	1	0	0	2	2	2	0
468	532	4070	152	4254000	5	2	5	1	1	1	0	1	1	1	1	1	1	2	1	1	0	1	1	1	0	1	1	1	2
59	843	33	4	2903	1	4	3	1	0	1	0	0	1	1	2	1	0	0	1	0	0	1	1	0	0	2	2	2	0
62	1227	47	11	3916	1	4	3	1	0	1	0	1	1	1	2	1	1	2	1	2	0	1	1	0	0	2	2	2	0
65	140	16	0	9	5	3	1	1	0	1	0	0	1	1	2	1	2	2	1	2	0	1	1	1	0	2	2	2	0
129	225	451	477	5033	2	4	5	1	0	1	0	1	1	1	1	1	1	1	1	2	0	1	1	1	0	2	2	2	2
164	1553	257	14	9439	2	1	3	1	0	1	0	0	1	1	2	1	2	2	1	2	0	1	1	0	0	2	2	2	0
66	587	41	1	67000	2	1	1	0	0	1	0	0	2	1	2	1	2	2	2	2	0	1	1	1	0	2	2	2	2
54	823	51	1	5424	1	4	3	1	0	1	0	1	1	1	1	1	0	0	1	0	0	1	1	0	0	2	2	2	0
241	28	977	21	4424000	3	4	4	1	1	1	0	1	1	1	2	1	2	2	1	1	0	1	1	1	0	1	1	1	2
170	722	101	3	26	1	4	4	1	0	1	0	1	1	1	1	1	1	1	1	2	0	1	1	1	0	1	2	2	2
328	72	21	2	48	5	1	3	1	0	1	0	1	1	1	2	1	1	2	1	1	0	1	1	2	0	1	1	2	2
980	587	89	4	67000	2	1	4	1	0	1	0	1	1	1	2	1	1	2	1	1	0	0	1	0	0	1	1	2	0
80	30	347	28	114000	5	3	3	1	0	1	0	1	1	1	2	1	1	2	1	2	0	1	1	1	0	1	2	2	2

## Sheet: tiktok
Duration (s)	Days since upload (d)	Likes	Comments	Followers	Video source	Video theme	GQS	mDISCERN_1	mDISCERN_2	mDISCERN_3	mDISCERN_4	mDISCERN_5	PEMATU_1	PEMATU_2	PEMATU_3	PEMATU_4	PEMATU_5	PEMATU_6	PEMATU_7	PEMATU_8	PEMATU_9	PEMATU_10	PEMATU_11	PEMATU_12	PEMATU_13	PEMATA_1	PEMATA_2	PEMATA_3	PEMATA_4
54	346	53300	944	980700	1	2	3	1	0	1	0	0	1	1	1	1	0	0	1	1	2	1	1	1	0	1	1	1	0
74	180	36000	503	980700	1	4	4	1	0	1	0	0	1	1	1	1	0	0	1	1	1	1	1	1	0	1	1	1	0
23	543	293500		502200	1	2	3	1	0	1	0	0	1	1	1	1	0	0	1	1	2	1	1	2	0	1	1	0	0
30	375	115400	1463	195800	3	2	3	1	0	0	0	0	1	1	1	1	0	0	1	1	2	2	1	1	0	2	1	0	0
59	1914	2012	136	209900	1	1	4	1	1	1	0	1	1	1	1	1	1	2	1	1	2	1	1	1	0	1	1	1	1
84	30	189	7	82400	2	4	4	1	0	1	0	0	1	1	1	1	1	2	1	1	2	1	1	1	0	1	1	1	0
7	241	294	11	2700000	1	4	2	1	0	0	0	0	1	2	2	2	0	0	1	1	2	2	0	2	0	2	2	2	0
37	686	28400	542	980700	1	4	3	1	0	1	0	0	1	1	1	1	0	0	1	1	2	1	1	1	0	1	1	1	0
62	461	201	10	260500	1	4	2	1	0	0	0	0	1	2	2	1	2	2	1	1	2	2	1	2	0	1	1	2	0
53	882	1109	22	2600000	1	4	2	1	0	1	0	0	1	1	1	1	1	1	1	1	2	2	1	2	1	1	1	1	0
60	810	81500	774	980700	1	3	2	1	0	1	1	0	1	1	1	1	0	0	1	1	2	1	1	1	0	1	1	1	1
100	52	384	50	44600	1	4	2	1	0	1	0	0	1	1	1	1	2	2	1	1	2	1	1	0	0	1	1	0	0
7	531	43200	1793	7600000	1	4	1	0	0	0	0	0	2	1	1	2	0	0	1	1	2	1	1	2	0	2	1	2	0
56	303	19100	486	980700	1	4	3	1	0	1	0	0	1	1	1	1	0	2	1	1	1	1	1	1	0	1	1	1	0
36	899	36300	376	980700	1	3	3	1	0	1	0	0	1	1	1	1	0	2	1	1	1	1	1	1	0	1	1	1	0
32	219	1961	56	980700	1	4	3	1	0	1	0	0	1	1	1	1	0	2	1	1	1	1	1	1	0	1	1	1	0
87	299	11100	536	520100	1	4	2	1	0	1	0	0	1	1	1	2	2	2	1	1	2	1	1	0	0	1	2	1	0
12	527	26600	1691	502200	1	4	2	1	0	0	0	0	1	1	1	1	0	0	1	1	1	1	1	0	0	1	1	2	0
17	591	384300	2867	980700	1	4	2	1	0	1	0	0	1	1	1	1	0	0	1	1	2	1	1	1	0	1	1	0	0
36	773	23.6	234	7600000	1	4	2	1	0	0	0	0	1	1	1	1	0	0	2	1	2	2	1	1	0	2	1	0	0
468	698	161900	4019	1700000	1	4	4	1	1	1	1	0	1	1	1	1	1	2	1	1	1	0	1	1	0	1	1	1	1
55	13	169300	3004	12300	1	4	2	1	0	1	0	0	1	1	1	1	1	1	1	1	2	1	1	0	0	1	1	0	0
136	180	37000	1073	10100	1	4	2	1	1	1	0	0	1	2	2	1	1	1	1	1	2	1	1	2	0	1	1	1	0
86	271	110600	898	164600	1	3	3	1	1	1	0	0	1	1	1	1	1	2	1	2	2	1	1	1	0	1	1	1	0
175	564	20200	1145	1700000	1	4	3	1	1	0	0	0	1	1	2	1	1	2	1	2	2	2	1	0	0	1	1	0	0
16	1278	11400	193	223000	1	4	3	1	1	1	0	0	1	1	1	1	1	1	1	2	1	1	1	1	0	1	1	1	0
62	475	1222	41	260500	1	4	2	0	0	0	0	0	2	1	1	1	2	2	1	1	2	0	1	2	0	1	1	2	0
69	99	276	9	542	2	4	2	1	0	0	0	0	1	1	1	1	2	2	1	2	2	1	1	2	0	1	1	2	0
426	383	1655	10	7333	2	4	4	1	1	1	1	0	1	1	1	1	1	1	1	1	2	1	1	1	0	1	1	1	0
84	674	16	0	6410	1	4	2	0	0	1	0	0	2	1	1	1	2	2	1	2	2	1	1	0	0	2	1	2	0
25	8	112	6	3392	2	4	3	1	1	1	1	0	1	1	1	1	0	0	1	1	1	1	1	1	0	1	1	0	0
369	658	2613	2	27100	1	4	3	1	1	1	0	0	1	1	1	1	1	2	1	1	2	1	2	1	0	1	1	1	0
155	21	98	21	12000	1	2	3	1	1	1	1	0	1	1	1	1	1	2	1	1	1	1	1	1	0	1	1	1	0
44	564	208	7	47600	1	4	2	0	1	1	0	0	2	1	1	1	2	2	1	2	2	1	1	0	0	1	1	2	0
87	323	140	2	14900	3	2	3	1	1	1	0	0	1	1	1	1	2	2	1	1	2	1	1	1	0	1	1	0	0
71	421	21700		1579	5	4	1	0	0	0	0	0	2	1	0	1	2	2	2	1	2	0	1	0	0	2	1	2	0
404	190	2628	117	590	1	1	2	1	1	0	0	0	1	1	1	2	2	2	2	2	2	1	2	0	0	0	0	0	0
45	315	102	3	1417	3	4	2	1	1	1	0	0	1	1	1	2	2	2	1	2	2	1	1	1	0	0	0	0	0
89	424	2878	133	38600	1	4	3	1	1	1	0	0	1	1	1	1	1	2	1	1	2	1	1	1	0	1	1	1	0
40	1169	2149	48	35900	1	1	2	1	1	0	0	0	1	1	1	1	2	2	2	1	2	0	2	0	0	0	0	0	0
266	184	153	10	4139	4	3	3	1	1	1	0	1	1	1	1	1	1	1	1	2	2	0	1	0	0	1	1	1	0
106	1124	1094	32	6187	5	4	3	1	1	1	0	0	1	1	1	1	2	2	1	1	1	0	1	1	0	1	1	1	0
49	305	56	1	4802	1	4	2	1	0	0	0	0	1	1	1	1	2	2	1	2	2	1	1	2	0	0	1	0	0
22	763	140000	3424	1100000	4	3	2	1	0	0	0	0	1	1	0	1	1	1	1	2	2	1	1	0	0	1	0	0	0
11	1551	1954	32	1000000	3	4	2	0	0	0	0	0	0	1	1	2	0	0	1	1	2	1	0	1	0	0	0	0	0
62	45972	4641	33	83200	3	4	4	1	1	1	0	0	1	1	1	1	1	2	1	1	2	1	1	1	0	1	1	1	1
75	57	2760	60	683600	1	1	3	1	1	0	0	0	1	1	1	1	2	2	1	1	2	0	1	2	0	0	0	0	0
119	634	151500	3826	71200	1	4	3	1	1	1	0	0	1	2	2	2	1	2	1	1	2	1	1	0	0	1	1	1	0
58	47	58	21	1598	1	4	2	1	0	0	0	0	1	1	1	1	2	2	1	2	2	1	1	0	0	1	1	0	0
62	808	105	4	85600	1	4	2	1	0	1	0	0	1	1	1	1	2	2	1	1	1	0	1	0	0	1	1	0	0
43	948	121.1	1236	143600	4	4	2	1	1	1	0	0	1	1	2	2	1	1	1	2	1	1	1	1	0	1	1	1	0
66	815	1048	17	74000	1	4	3	1	1	1	0	0	1	1	1	1	1	1	1	1	2	0	1	0	0	1	1	1	0
57	977	2736	79	22500	1	2	2	1	1	0	0	0	1	1	1	1	2	2	1	2	2	1	1	0	0	0	0	0	0
84	972	64700	449	1597	2	4	4	1	1	1	0	0	1	1	1	1	1	2	1	1	2	0	1	1	0	1	1	1	0
87	689	21500	277	2600000	3	4	4	1	0	1	0	0	1	1	1	1	2	2	1	1	1	1	1	1	0	1	1	1	0
37	20	3930	58	980700	1	4	4	1	0	1	0	0	1	1	1	1	2	2	1	1	1	1	1	1	0	1	1	1	0
58	1510	59200	515	808500	1	4	4	1	1	1	1	1	1	1	1	1	2	2	1	1	2	0	1	0	0	1	1	1	0
92	38	106	10	44600	1	4	4	1	1	1	0	1	1	1	1	1	2	2	1	1	1	2	1	0	0	1	1	2	0
40	1745	8307	125	105100	1	4	4	1	1	1	1	0	1	1	1	1	1	2	1	2	2	1	1	1	2	1	1	1	0
82	39	152	20	44600	1	4	3	1	1	1	0	0	1	1	1	1	2	2	1	1	2	1	1	0	0	1	1	2	0
26	1683	15000	309	808500	1	4	4	1	1	1	0	0	1	1	1	1	0	0	1	1	1	1	1	0	0	1	1	1	0
92	38	93	11	44600	1	4	3	1	1	1	0	0	1	1	1	1	2	2	1	1	2	1	1	0	0	1	1	2	0
59	286	340	14	167100	1	1	4	1	1	1	0	0	1	1	1	2	1	1	1	2	2	1	1	1	0	0	0	0	0
45	158	4309	135	2700000	1	4	4	1	1	1	0	0	1	1	1	1	1	1	1	2	1	1	1	1	0	1	1	1	0
48	1060	11800	268	980700	1	4	4	1	1	1	0	0	1	1	1	1	1	1	1	1	2	1	1	1	0	1	1	1	0
18	1383	26.7	603	2700000	1	1	2	1	1	0	0	0	1	1	1	2	0	0	1	2	2	1	0	0	0	0	0	0	0
114	1351	1720	80	368600	1	4	4	1	1	1	0	1	1	1	1	1	1	2	1	2	2	0	1	1	0	1	1	1	1
41	1172	1585	91	368600	1	2	2	1	0	0	0	0	1	1	1	1	2	2	1	1	2	0	1	0	0	1	1	2	0
59	1511	8632	145	756100	1	4	4	1	1	1	1	1	1	1	1	1	2	2	1	1	2	1	1	1	0	1	1	0	0
53	1006	56000	1157	980700	1	4	4	1	1	1	0	0	1	1	1	1	1	1	1	1	2	1	1	1	0	1	1	1	0
76	347	2387	79	164600	1	4	3	1	1	1	0	0	1	1	1	1	2	2	1	1	2	2	1	1	0	1	1	1	0
55	972	30700	1522	683600	1	4	3	1	1	1	0	0	1	1	1	1	2	2	1	2	1	1	1	1	0	1	1	1	0
54	107	20500	405	980700	1	4	3	1	1	1	0	0	1	1	1	1	1	1	1	1	2	1	1	1	0	1	1	1	0
44	1271	9718	218	980700	1	4	3	1	1	1	0	0	1	1	1	1	1	1	1	1	2	1	1	1	0	1	1	1	0
23	1164	1448	69	502200	1	4	2	1	0	0	0	0	1	1	1	2	0	0	1	2	2	0	1	0	0	0	0	0	0
33	313	27800	533	980700	1	4	3	1	1	1	0	0	1	1	1	1	1	1	1	1	2	1	1	1	0	1	1	1	0
61	446	6007	208	363200	1	4	3	1	1	1	0	0	1	1	1	1	2	2	1	2	2	0	1	1	0	1	1	2	0
47	287	195900	8912	164600	1	4	3	1	1	1	0	0	1	1	1	1	2	2	1	1	2	1	1	1	0	1	1	1	0
120	951	7955	471	683600	1	4	3	1	1	1	0	0	1	1	1	1	1	2	1	1	2	1	1	0	0	1	1	1	0
16	647	4028	113	11300	3	4	1	1	0	0	0	0	1	1	1	2	0	0	1	1	2	1	1	0	0	2	2	2	0
70	1259	4574	128	317700	1	3	2	1	1	0	0	0	1	1	1	1	2	2	2	1	2	0	1	0	0	1	1	1	0
128	945	206	27	156300	1	4	3	1	1	1	0	0	1	1	1	1	2	2	1	1	2	1	1	0	0	1	1	2	0
97	813	6616	302	683600	1	2	4	1	1	1	0	1	1	1	1	1	2	2	1	1	2	2	1	0	0	1	1	0	0
55	333	27700	520	164600	1	4	3	1	1	1	0	0	1	1	1	2	2	2	1	1	2	1	1	1	0	1	1	0	0
46	956	19300	492	980700	1	4	3	1	1	1	0	0	1	1	1	1	1	2	1	1	2	1	1	1	0	1	1	1	0
64	177	944	61	214700	3	4	2	1	1	1	0	0	1	1	1	2	2	2	1	2	2	1	1	0	0	1	1	2	0
34	1243	985	35	143600	1	4	3	1	1	1	0	0	1	1	1	1	1	2	1	1	2	1	1	1	0	1	1	1	0
25	1606	10600	221	502200	1	3	3	1	1	1	0	0	1	1	1	1	1	2	1	1	2	1	1	1	0	1	1	1	0
130	177	9620	152	164600	1	4	4	1	1	1	0	1	1	1	1	1	1	2	1	1	2	1	1	1	0	1	1	1	0
80	790	5096	229	683600	1	2	3	1	1	1	0	0	1	1	1	1	2	2	1	1	2	2	1	0	0	1	1	0	0
104	1124	945	39	368600	1	4	3	1	1	1	0	0	1	1	1	1	1	2	1	2	2	0	1	1	0	0	0	0	1
84	75	1483	41	161100	1	4	3	1	1	1	0	0	1	1	1	1	2	2	1	1	2	1	1	0	0	1	1	0	0
49	573	62100	1314	38600	1	4	3	1	1	1	0	0	1	1	1	1	2	2	1	1	2	1	1	1	0	1	1	0	0
164	1138	59800	1298	1700000	1	3	2	0	1	1	0	0	2	1	1	1	2	2	2	2	2	0	1	0	0	1	1	0	0
179	1139	366300	5505	1700000	1	4	2	0	1	1	0	0	2	1	1	1	2	2	2	2	2	0	1	0	0	1	1	0	0
65	312	61	0	65800	3	4	4	1	1	1	1	0	1	1	1	1	1	2	1	1	2	1	1	1	0	0	0	0	0
55	319	20	3	16100	3	3	3	1	1	1	0	0	1	1	1	1	1	2	1	1	2	1	1	1	0	1	1	0	0
179	306	164400	6087	1700000	1	4	2	0	1	1	0	0	2	1	1	1	2	2	2	2	2	0	1	0	0	1	1	0	0
49	200	21600	243	71200	1	4	3	1	1	1	0	0	1	1	1	1	1	2	1	1	2	1	1	0	0	1	1	0	0
76	1488	130600	7374	16900	1	4	3	1	1	1	0	0	1	1	1	1	1	2	1	1	2	0	1	1	0	1	1	1	0

## Sheet: youtube
Duration (s)	Days since upload (d)	Likes	Comments	Followers	Video source	Video theme	GQS	mDISCERN_1	mDISCERN_2	mDISCERN_3	mDISCERN_4	mDISCERN_5	PEMATU_1	PEMATU_2	PEMATU_3	PEMATU_4	PEMATU_5	PEMATU_6	PEMATU_7	PEMATU_8	PEMATU_9	PEMATU_10	PEMATU_11	PEMATU_12	PEMATU_13	PEMATA_1	PEMATA_2	PEMATA_3	PEMATA_4
295	3632	337979	11388	22200000	3	4	5	1	1	1	1	1	1	1	1	1	1	2	1	1	1	1	1	1	0	1	1	1	1
9	1625	5646	161	588000	1	3	1	1	0	0	0	0	1	1	0	2	0	0	1	1	2	1	0	0	0	1	1	2	0
236	3803	648	14	826000	2	4	4	1	1	1	1	1	1	1	1	1	1	1	1	1	1	1	1	1	0	0	0	0	0
177	880	150	4	459	3	4	3	1	1	1	1	0	1	1	1	1	1	1	1	1	1	0	1	1	0	0	0	0	0
23	430	55703	2484	588000	1	2	3	1	0	1	0	0	1	1	1	1	0	0	1	1	2	1	1	2	0	1	1	0	0
195	2654	10038	950	4210000	3	4	5	1	1	1	1	0	1	1	1	1	1	1	1	1	1	1	1	1	0	1	1	1	1
166	2809	1884	32	190000	3	4	3	1	1	1	1	0	1	1	1	2	1	1	1	1	1	1	2	0	0	1	1	1	0
836	1233	15410	928	194000	1	4	5	1	1	1	1	1	1	1	1	1	1	1	1	1	1	1	1	1	1	1	1	1	1
339	1584	15951	0	6970000	3	4	5	1	1	1	1	0	1	1	1	1	1	2	1	1	1	1	1	1	0	1	1	1	0
12	1228	16668	639	588000	1	4	1	1	0	0	0	0	1	1	0	2	0	0	1	1	2	1	0	0	0	2	2	2	0
13	1054	4188	136	588000	1	3	3	1	0	1	0	0	1	1	1	1	0	0	1	1	2	0	1	2	0	1	1	0	0
26	475	5462	67	2740	3	4	3	1	0	1	0	0	1	1	1	1	0	0	1	1	2	1	1	1	0	1	1	2	0
58	842	1761	75	8600	1	4	3	1	0	1	0	0	1	1	1	1	2	2	1	1	2	1	1	2	0	1	1	1	0
326	892	55630	1714	22200000	3	4	5	1	1	1	1	1	1	1	1	1	1	2	1	1	1	1	1	1	0	0	0	0	0
658	1783	17382	1780	15300000	3	4	5	1	1	1	1	1	1	1	1	1	1	2	1	1	1	1	1	1	0	1	1	1	0
281	3085	2200	88	15300000	3	4	5	1	1	1	1	1	1	1	1	1	1	2	1	1	1	1	1	1	0	1	1	1	0
907	1632	4389	139	1650000	2	1	5	1	1	1	1	1	1	1	2	1	1	1	1	1	1	1	1	1	1	0	0	0	0
1151	2798	687	76	936	1	4	4	1	1	1	1	1	1	1	1	1	1	1	1	1	2	1	1	1	0	1	1	1	1
448	1921	3328	710	170000	1	4	3	1	1	1	0	0	1	1	1	1	1	2	1	1	2	0	1	2	0	1	1	2	0
23	1668	5292	239	302000	1	4	3	1	1	1	0	0	1	1	1	1	0	0	1	1	2	0	1	2	0	1	1	1	0
17	1000	113326	1552	588000	1	4	2	1	0	0	0	0	1	1	1	1	0	0	1	1	2	0	1	0	0	1	1	2	0
22	429	583	0	2000	1	4	2	1	0	1	0	0	1	1	1	1	0	0	1	1	2	0	1	0	0	1	1	1	0
58	316	2774	31	75600	3	4	3	1	1	1	0	0	1	1	1	1	2	2	1	1	1	1	1	1	0	1	1	1	0
59	2080	4	0	177	3	4	3	1	1	0	0	0	1	1	1	1	2	2	1	1	2	1	1	0	0	2	1	2	0
663	1983	6089	1083	9780	1	2	3	1	1	1	0	1	1	1	1	1	1	2	1	2	2	0	1	0	0	1	1	2	0
14	1244	3181	110	588000	1	4	3	1	0	1	0	0	1	1	1	1	0	0	1	1	2	0	1	0	0	1	1	2	0
106	1297	13	0	120000	3	4	2	1	1	1	0	0	1	1	2	2	1	2	1	1	2	1	1	0	0	1	1	2	0
885	1947	24921	1246	1800000	2	1	5	1	1	1	1	1	1	1	1	1	1	1	1	1	1	1	1	1	1	1	1	1	1
60	445	49781	117	3840000	2	4	1	0	0	0	0	0	0	1	1	2	2	2	1	2	2	0	1	0	0	1	2	2	0
15	429	1294	15	1270000	3	2	1	0	0	0	0	0	0	1	0	2	0	0	2	2	2	0	0	1	0	1	1	2	0
16	1242	6050	123	588000	1	1	2	1	0	1	0	0	1	1	1	1	0	0	1	1	2	0	1	0	0	0	0	0	0
33	977	102725	1332	1520000	1	4	3	1	1	1	0	0	1	1	1	1	2	2	1	2	2	1	1	1	0	1	1	1	0
20	741	21001	105	195000	2	4	2	1	1	1	0	0	1	1	1	2	0	0	1	2	2	0	0	1	0	1	1	2	0
69	1238	1	0	11800	2	4	3	1	1	1	0	0	1	1	1	1	2	2	1	1	2	0	1	0	0	1	1	1	0
1740	487	8746	486	194000	1	4	5	1	1	1	1	1	1	1	1	1	1	1	1	1	1	1	1	1	0	1	1	1	1
1375	1730	32902	5147	194000	1	4	5	1	1	1	1	1	1	1	1	1	1	1	1	1	1	1	1	1	0	1	1	1	1
240	1028	150	0	460000	3	4	4	1	1	1	0	0	1	1	1	1	1	1	1	1	2	1	1	1	0	1	1	1	0
444	85	0	7888	31400	2	4	5	1	1	1	1	1	1	1	1	1	1	1	1	1	2	0	1	1	0	1	1	1	0
132	3327	333	0	2220	2	4	4	1	1	1	0	0	1	1	1	1	2	2	1	1	2	0	1	1	0	1	1	1	0
529	1400	17683	1923	194000	1	2	5	1	1	1	1	1	1	1	1	1	1	1	1	1	1	1	1	1	0	1	1	1	1
346	1941	78	8	211000	1	4	4	1	1	1	0	0	1	1	1	1	1	1	1	1	2	0	2	2	0	1	1	1	0
536	2416	1634	480	1050000	4	4	4	1	1	0	1	1	1	1	1	1	1	1	1	1	2	2	1	0	0	1	1	2	0
9	1198	5007	59	5820	1	1	1	0	0	0	0	0	2	1	1	2	0	0	2	1	2	1	1	0	0	0	0	0	0
21	790	905	66	13800	1	3	3	1	1	1	0	0	1	1	1	1	0	0	1	1	2	1	1	0	0	1	1	2	0
30	615	2482	96	22500	1	1	2	1	1	1	0	0	1	1	1	1	0	0	1	2	2	0	0	0	0	1	2	2	0
33	303	13936	445	1630	1	4	2	1	1	1	0	0	1	1	1	1	0	0	1	2	2	0	0	0	0	1	2	2	0
1154	2048	36000	5039	2430000	3	4	4	1	1	1	1	1	1	1	1	1	1	1	1	1	2	0	1	2	0	1	1	2	0
12	874	2250	158	3110	1	4	2	0	1	1	0	0	2	1	1	1	0	0	1	2	2	0	0	0	0	1	2	2	0
55	450	3992	14	1170000	1	4	3	1	1	1	0	0	1	1	1	1	1	1	1	1	1	1	2	1	0	1	1	1	0
174	241	0	0	2100	2	4	3	1	1	1	0	0	1	1	1	1	1	1	1	1	2	1	1	0	0	1	1	2	0
146	1689	36	3	51200	2	4	4	1	1	1	1	0	1	1	1	1	1	1	1	1	1	1	1	1	0	1	1	1	0
247	2610	887	0	2220	2	4	5	1	1	1	1	0	1	1	1	1	1	2	1	1	1	1	1	1	0	1	1	1	0
660	3	0	0	19	1	4	4	1	1	1	1	0	1	1	1	1	1	1	1	1	2	1	1	1	0	1	1	1	0
394	2050	634	17	938	1	4	4	1	1	1	0	1	1	1	1	1	1	2	1	1	2	0	1	2	0	1	1	1	0
31	1504	22	2	682	3	1	3	1	1	1	0	0	1	1	1	1	2	2	1	1	1	1	1	1	0	0	0	0	0
59	637	40143	854	1520000	1	4	3	1	1	1	0	0	1	1	1	1	2	2	1	2	2	1	1	1	0	1	1	1	0
12	1599	1249	20	588000	1	4	3	1	1	1	0	0	1	1	1	1	0	0	1	1	2	0	1	0	0	1	1	1	0
84	232	253	0	17400	3	4	4	1	1	1	1	1	1	1	1	1	1	2	1	1	2	1	1	1	0	1	1	1	0
49	892	89918	1396	1520000	1	4	3	1	1	1	0	0	1	1	1	1	2	2	1	2	2	1	1	1	0	1	1	1	0
33	601	0	18	1780	1	4	3	1	1	1	0	0	1	1	1	1	2	2	1	1	2	1	1	1	0	1	1	1	0
128	1743	19	4	39	2	4	3	1	1	1	0	0	1	1	1	1	1	1	1	1	2	0	1	0	0	1	1	1	0
16	544	1230	3	847	2	4	2	1	1	1	0	0	1	1	1	1	0	0	2	1	2	1	0	0	0	1	2	2	0
30	377	458698	1035	802000	3	2	3	1	0	0	0	0	1	1	1	1	0	0	1	1	2	2	1	1	0	2	1	0	0
568	96	2472	78	649000	3	4	5	1	1	1	1	1	1	1	1	1	1	1	1	1	1	1	1	1	0	1	1	1	1
21	726	7601	101	1520000	1	1	3	1	1	1	0	0	1	1	1	1	0	0	1	1	2	2	1	1	0	0	0	0	0
48	412	18238	0	521000	2	4	3	1	1	1	0	0	1	1	1	1	2	2	1	2	2	1	2	1	0	1	1	2	0
15	485	3001	16	195000	3	4	2	1	1	1	0	0	1	1	1	1	0	0	1	2	2	0	0	2	0	1	1	2	0
569	210	1561	303	588000	1	4	5	1	1	1	1	1	1	1	1	1	1	1	1	1	1	1	1	1	1	1	1	1	1
42	300	4609	252	1520000	1	4	3	1	1	1	0	0	1	1	1	1	2	2	1	1	2	1	1	1	0	1	1	2	1
23	816	743	0	1100	3	4	2	1	1	1	0	0	1	1	1	2	0	0	1	2	1	0	0	2	0	1	1	2	0
994	1592	31619	2173	588000	1	1	5	1	1	1	1	0	1	1	1	1	1	2	1	1	1	1	1	1	0	0	0	0	0
59	415	2857	58	2020	1	1	3	1	1	1	0	0	1	1	1	1	0	0	1	1	2	2	1	1	0	0	0	0	0
43	3077	14	0	1360	1	4	2	1	1	1	0	0	1	1	1	1	2	2	1	1	2	0	2	0	0	1	1	1	0
98	3992	71	3	400	2	3	3	1	1	1	0	0	1	1	1	2	2	2	1	1	2	0	1	2	0	1	1	2	0
58	624	124	1	1300000	3	4	3	1	1	1	0	0	1	1	1	1	1	2	1	1	2	2	1	1	0	1	1	1	0
459	2223	8	0	4280	1	4	5	1	1	1	1	1	1	1	1	1	1	1	1	1	1	1	1	1	0	1	1	1	1
42	237	85	0	750	2	4	3	1	1	1	0	0	1	1	1	1	1	1	1	1	1	1	2	1	0	1	1	1	0
89	3818	2	1	400	2	4	3	1	1	1	0	0	1	1	1	1	1	1	1	1	1	2	2	1	0	1	1	1	0
74	3443	109	8	296000	2	4	4	1	1	1	0	0	1	1	1	1	1	1	1	1	2	0	1	1	0	1	1	1	0
45	247	4728	69	1020000	3	4	4	1	1	1	0	0	1	1	1	1	1	1	1	1	2	1	1	1	1	1	1	1	1
50	3256	6	0	108	1	2	2	1	0	1	0	0	1	1	1	1	2	2	1	1	2	0	1	0	0	1	1	2	0
32	213	2652	69	210000	1	4	3	1	1	1	0	0	1	1	1	1	2	2	1	1	2	0	1	1	0	1	1	2	0
580	2013	1500	135	11800	1	1	4	1	1	0	1	1	1	1	1	1	1	1	1	1	2	1	1	0	0	0	0	0	0
219	2955	1000	295	10000	2	2	4	1	1	1	0	1	1	1	1	1	1	2	1	1	2	1	1	1	0	1	1	1	0
42	974	4545	121	1520000	1	1	3	1	1	1	0	0	1	1	1	1	0	0	1	1	2	2	1	1	0	0	0	0	0
31	457	7	0	106	3	4	2	1	0	1	0	0	1	1	1	2	2	2	1	1	2	0	1	2	0	1	1	2	0
108	2233	1800	65	778	3	4	4	1	1	1	0	0	1	1	1	1	2	2	1	1	2	1	1	1	0	0	0	0	0
517	602	12585	859	194000	1	4	5	1	1	1	1	1	1	1	1	1	1	1	1	1	1	1	1	1	0	1	1	1	1
116	228	1636	97	16800	1	4	3	1	1	1	0	0	1	1	1	1	1	2	1	1	2	0	1	2	0	1	1	1	0
657	1828	38	4	1090	1	4	4	1	1	1	0	0	1	1	1	1	1	2	1	1	2	0	1	1	0	1	1	1	0
375	651	3	0	362	1	4	3	1	1	1	0	0	1	1	1	1	2	2	1	1	2	1	1	0	0	1	1	1	0
184	2231	0	268	11500	1	4	4	1	1	1	1	1	1	1	1	1	1	2	1	1	2	0	1	1	0	1	1	1	0
975	859	95000	9886	590000	1	4	4	1	1	1	1	1	1	1	1	1	1	1	1	1	2	0	1	0	0	1	1	1	0
600	1935	29000	1840	194000	1	3	5	1	1	1	1	1	1	1	1	1	1	1	1	1	2	1	1	1	0	1	1	1	0
148	70	13	3	91600	1	4	3	1	1	1	0	0	1	1	1	1	1	1	1	2	2	1	1	1	0	1	1	1	0
50	316	2595	29	89000	3	1	3	1	1	0	0	0	1	1	1	1	2	2	1	1	2	0	2	0	0	0	0	0	0
25	986	0	0	4960	1	4	2	1	0	1	0	0	1	1	1	1	0	0	1	1	2	0	1	0	0	1	1	2	0
35	111	0	0	50	2	4	3	1	1	1	0	0	1	1	1	1	2	2	1	1	2	1	1	0	0	1	1	1	0
912	1692	29000	831	182000	1	1	3	1	1	1	0	0	1	1	1	1	1	1	1	2	2	0	1	0	0	0	0	0	0
186	206	1	0	487	3	4	2	1	1	1	0	0	1	1	1	2	2	2	1	2	2	1	1	0	0	1	1	2	0
