# Supplementary material
Source: Research Square preprint supplement (doi:10.21203/rs.3.rs-9635247/v1)
Supplement: Supplementary file 4 [file ee1d8e40d39af2c0a8e0cb7f.docx]

**Multimedia Appendix 2.** Dunn test across different platforms.

| **Variable** | **Comparison** | **Z** | **P_unadjusted** | **P_adjusted** |
| --- | --- | --- | --- | --- |
| Duration (s) | 1-2 | 5.579 | <0.001 | <0.001 |
| Duration (s) | 1-3 | 7.883 | <0.001 | <0.001 |
| Duration (s) | 1-4 | 4.602 | <0.001 | <0.001 |
| Duration (s) | 2-3 | 2.304 | 0.021 | 0.127 |
| Duration (s) | 2-4 | -0.977 | 0.328 | 1 |
| Duration (s) | 3-4 | -3.281 | 0.001 | 0.006 |
| Days since upload (d) | 1-2 | 5.211 | <0.001 | <0.001 |
| Days since upload (d) | 1-3 | 1.897 | 0.058 | 0.347 |
| Days since upload (d) | 1-4 | -2.722 | 0.006 | 0.039 |
| Days since upload (d) | 2-3 | -3.314 | <0.001 | 0.006 |
| Days since upload (d) | 2-4 | -7.933 | <0.001 | <0.001 |
| Days since upload (d) | 3-4 | -4.619 | <0.001 | <0.001 |
| Likes | 1-2 | -2.49 | 0.013 | 0.077 |
| Likes | 1-3 | -6.161 | <0.001 | <0.001 |
| Likes | 1-4 | -3.271 | 0.001 | 0.006 |
| Likes | 2-3 | -3.671 | <0.001 | 0.001 |
| Likes | 2-4 | -0.781 | 0.435 | 1 |
| Likes | 3-4 | 2.89 | 0.004 | 0.023 |
| Comments | 1-2 | -3.166 | 0.002 | 0.009 |
| Comments | 1-3 | -3.698 | <0.001 | 0.001 |
| Comments | 1-4 | -1.023 | 0.306 | 1 |
| Comments | 2-3 | -0.548 | 0.584 | 1 |
| Comments | 2-4 | 2.143 | 0.032 | 0.193 |
| Comments | 3-4 | 2.68 | 0.007 | 0.044 |
| Followers | 1-2 | -2.312 | 0.021 | 0.125 |
| Followers | 1-3 | -7.176 | <0.001 | <0.001 |
| Followers | 1-4 | -4.504 | <0.001 | <0.001 |
| Followers | 2-3 | -4.865 | <0.001 | <0.001 |
| Followers | 2-4 | -2.193 | 0.028 | 0.17 |
| Followers | 3-4 | 2.672 | 0.008 | 0.045 |
| GQS | 1-2 | -1.075 | 0.282 | 1 |
| GQS | 1-3 | 2.071 | 0.038 | 0.23 |
| GQS | 1-4 | -1.196 | 0.232 | 1 |
| GQS | 2-3 | 3.146 | 0.002 | 0.01 |
| GQS | 2-4 | -0.121 | 0.904 | 1 |
| GQS | 3-4 | -3.267 | 0.001 | 0.007 |
| mDISCERN | 1-2 | 0.732 | 0.464 | 1 |
| mDISCERN | 1-3 | 1.972 | 0.049 | 0.292 |
| mDISCERN | 1-4 | -2.507 | 0.012 | 0.073 |
| mDISCERN | 2-3 | 1.24 | 0.215 | 1 |
| mDISCERN | 2-4 | -3.239 | 0.001 | 0.007 |
| mDISCERN | 3-4 | -4.479 | <0.001 | <0.001 |
| PEMAT-U | 1-2 | -4.443 | <0.001 | <0.001 |
| PEMAT-U | 1-3 | -3.674 | <0.001 | 0.001 |
| PEMAT-U | 1-4 | -6.287 | <0.001 | <0.001 |
| PEMAT-U | 2-3 | 0.769 | 0.442 | 1 |
| PEMAT-U | 2-4 | -1.844 | 0.065 | 0.391 |
| PEMAT-U | 3-4 | -2.613 | 0.009 | 0.054 |
| PEMAT-A | 1-2 | 1.317 | 0.188 | 1 |
| PEMAT-A | 1-3 | -8.913 | <0.001 | <0.001 |
| PEMAT-A | 1-4 | -7.77 | <0.001 | <0.001 |
| PEMAT-A | 2-3 | -10.194 | <0.001 | <0.001 |
| PEMAT-A | 2-4 | -9.033 | <0.001 | <0.001 |
| PEMAT-A | 3-4 | 0.983 | 0.326 | 1 |

Note: 1-Bilibili, 2-Douyin, 3-TikTok, 4-YouTube.

Abbreviations: GQS, Global Quality Score; mDISCERN, modified DISCERN; PEMAT-U, Patient Education Materials Assessment Tool–Understandability; PEMAT-A, Patient Education Materials Assessment Tool–Actionability.
