# Supplementary material
Source: Research Square preprint supplement (doi:10.21203/rs.3.rs-9635247/v1)
Supplement: Supplementary file 5 [file ef0f5819e5e63e03b5b3bb14.docx]

**Multimedia Appendix 6.** Stepwise regression analysis (modified DISCERN).

| **Model** | **Predictors** | **R²** | **Adjusted R²** | **SE of the estimate** | **F change** | **P value**  **(F change)** | **ANOVA**  **F test (df)** | **ANOVA**  **P value** |
| --- | --- | --- | --- | --- | --- | --- | --- | --- |
| 1 | Constant  + Duration | 0.249 | 0.247 | 0.898 | 123.686 | <0.001 | 123.686 (1,373) | <0.001 |
| 2 | Constant  + Duration  + PEMAT-U | 0.367 | 0.364 | 0.826 | 69.614 | <0.001 | 108.026 (2,372) | <0.001 |
| 3 | Constant  + Duration  + PEMAT-U  + PEMAT-A | 0.389 | 0.384 | 0.812 | 13.307 | <0.001 | 78.836 (3,371) | <0.001 |

Abbreviations: PEMAT-U, Patient Education Materials Assessment Tool–Understandability; PEMAT-A, Patient Education Materials Assessment Tool–Actionability.
